# Supplementary material
Source: publisher figshare collection journal article supplement (https://acs.figshare.com/ndownloader/files/3763693)
Supplement: Supplementary file 1 [file 3763693]

# **Supporting Information for Quantification of Metabolites for Assessing Human Exposure to Soapberry Toxins Hypoglycin A and Methylenecyclopropylglycine**

Samantha L. Isenberg;<sup>1</sup> Melissa D. Carter;<sup>2\*</sup> Leigh Ann Graham;<sup>1</sup> Thomas P. Mathews;<sup>1</sup> Darryl Johnson;<sup>1</sup> Jerry D. Thomas;<sup>2</sup> James L. Pirkle;<sup>2</sup> Rudolph C. Johnson<sup>2</sup>

<sup>1</sup>Oak Ridge Institute for Science and Education Fellow at the Centers for Disease Control and Prevention, Atlanta, GA

<sup>2</sup>Division of Laboratory Sciences, National Center for Environmental Health, Centers for Disease Control and Prevention, Atlanta, GA

## **Table of Contents**

|                                                           |    |
|-----------------------------------------------------------|----|
| <b>Table S1.</b> Evaluation of ion suppression            | S2 |
| <b>Table S2.</b> Evaluation of post-preparative stability | S2 |

**Table S1.** For evaluation of ion suppression, MCPF-Gly and MCPA-Gly calibrators were prepared in both urine and water, and the average peak areas (n = 4) from urine and water were used to calculate a % difference.

| Analyte  | Conc.<br>(µg/mL) | Urine (n=4)                   | Water (n=4)                   | % Ion suppression <sup>a</sup> ± SD <sup>b</sup> |
|----------|------------------|-------------------------------|-------------------------------|--------------------------------------------------|
|          |                  | mean pk area ± SD             | mean pk area ± SD             |                                                  |
| MCPF-Gly | 0.200            | $(2.49 \pm 0.20) \times 10^3$ | $(2.36 \pm 0.30) \times 10^3$ | 105 ± 16 %                                       |
|          | 1.00             | $(1.06 \pm 0.04) \times 10^4$ | $(1.04 \pm 0.05) \times 10^4$ | 102 ± 6 %                                        |
|          | 5.00             | $(5.11 \pm 0.42) \times 10^4$ | $(4.88 \pm 0.06) \times 10^4$ | 105 ± 9 %                                        |
| MCPA-Gly | 0.200            | $(6.10 \pm 0.87) \times 10^3$ | $(5.76 \pm 0.21) \times 10^3$ | 106 ± 15 %                                       |
|          | 1.00             | $(2.79 \pm 0.05) \times 10^4$ | $(2.72 \pm 0.16) \times 10^4$ | 102 ± 6 %                                        |
|          | 5.00             | $(1.34 \pm 0.08) \times 10^5$ | $(1.30 \pm 0.02) \times 10^5$ | 103 ± 6 %                                        |

<sup>a</sup> % Ion suppression = [(pk area for urine sample)/(pk area for water sample)] \* 100

<sup>b</sup> SD = % difference \* [(SD of difference / difference)<sup>2</sup> + (SD of average / average)<sup>2</sup>]<sup>1/2</sup>

**Table S2.** Post-preparative stability of QCs (n = 4) in a 5 °C autosampler evaluated at 0, 24, and 72 hours.

| Analyte  | QC | 0 hours |       |       | 24 hours |       |       | 72 hours |      |       |
|----------|----|---------|-------|-------|----------|-------|-------|----------|------|-------|
|          |    | conc    | % RSD | % RE  | conc     | % RSD | % RE  | conc     | %RSD | % RE  |
| MCPF-Gly | QH | 7.19    | 6.3   | 2.6%  | 7.48     | 3.7   | 6.8%  | 7.51     | 3.5  | 7.3%  |
|          | QM | 1.55    | 7.4   | 3.5%  | 1.53     | 5.6   | 1.7%  | 1.63     | 4.3  | 8.5%  |
|          | QL | 0.274   | 10    | -8.8% | 0.285    | 8.6   | -5.1% | 0.289    | 11   | -3.8% |
| MCPA-Gly | QH | 7.23    | 2.4   | 3.3%  | 7.34     | 2.5   | 4.9%  | 7.21     | 2.9  | 2.9%  |
|          | QM | 1.51    | 8.5   | 0.5%  | 1.53     | 2.7   | 1.8%  | 1.56     | 5.0  | 4.0%  |
|          | QL | 0.269   | 15    | -10%  | 0.283    | 1.2   | -5.8% | 0.292    | 6.0  | -2.7% |
